# Supplementary material
Source: publisher figshare collection journal article supplement (https://acs.figshare.com/ndownloader/files/8360711)
Supplement: Supplementary file 1 [file 8360711]

**Table S1.** The transmittance and sheet resistance of the AgNW TCFs prepared using AgNWs solution with different concentration.

| C (mg/mL) | T (%) | R <sub>s</sub> ( $\Omega$ sq <sup>-1</sup> ) |
|-----------|-------|----------------------------------------------|
| 50.0      | 73    | 6.5                                          |
| 25.0      | 81    | 14.7                                         |
| 16.7      | 85    | 19.6                                         |
| 12.5      | 87    | 25.3                                         |
| 10.0      | 88    | 32.4                                         |
| 9.2       | 91    | 34.6                                         |
| 8.3       | 93    | 81.3                                         |
| 6.25      | 97    | 630                                          |

C is the concentration of the AgNWs solution; T is the transmittance of the AgNW TCFs measured at 550 nm; R<sub>s</sub> is sheet resistance of the AgNW TCFs.
